# Supplementary material for: High Expression of a Cancer Stemness-Related Gene, Chromobox 8 (CBX8), in Normal Tissue Adjacent to the Tumor (NAT) Is Associated with Poor Prognosis of Colorectal Cancer Patients
Source: MDPI journal article supplement (doi:10.3390/cells11111852), 2022-06-06
Supplement: s1 [file s1]

**NAT****CRC****#460**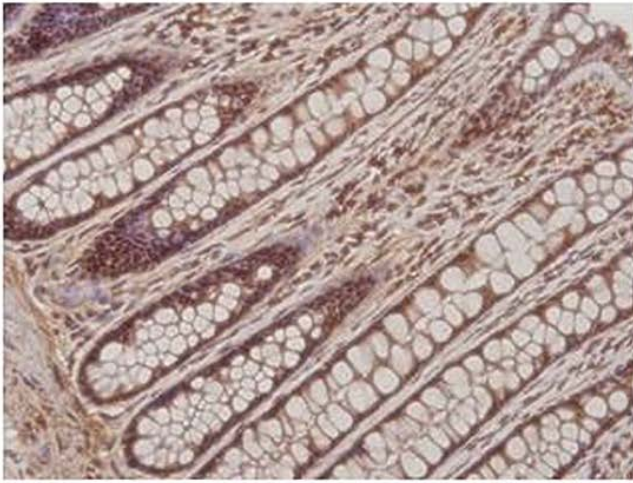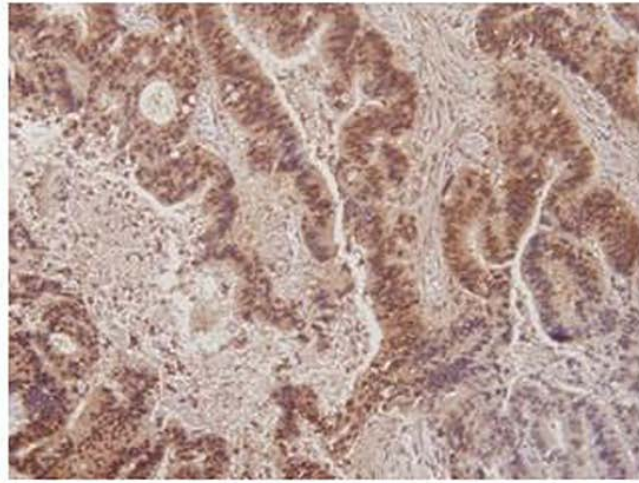**#391**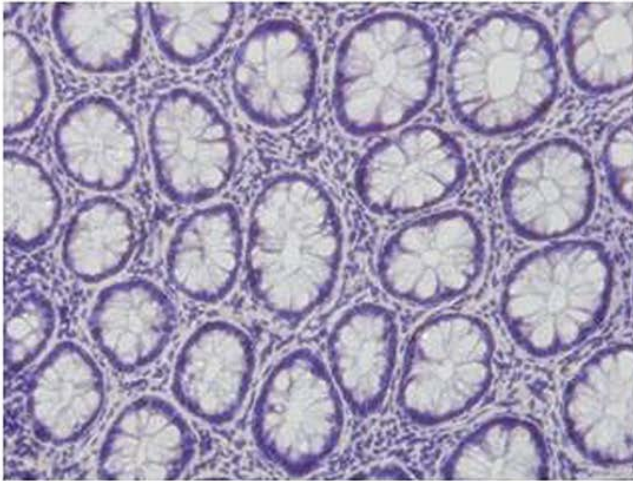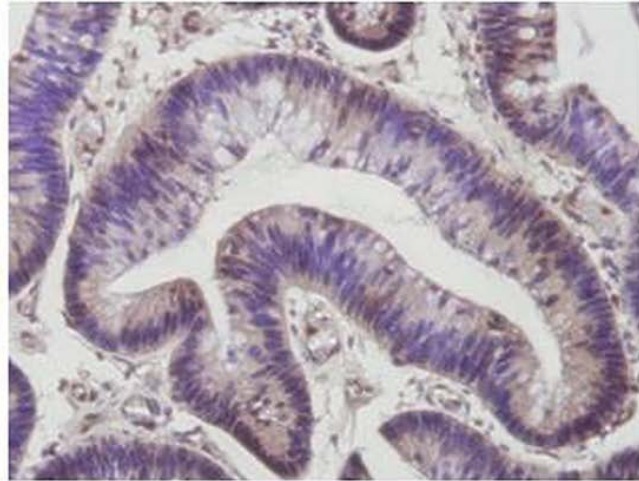

## **Supplementary figure S1**

Representative IHC stainings of CBX8 in patients #460 and #391 showed high level of CBX8 (#460) and low CBX8 (#391) in NAT and CRC specimens (Magnification: 40X). As shown by sample #460, crypt epithelial cells and stroma cells in NAT specimens are able to express CBX8.
